# Supplementary material for: Vehicle automation and freeway ‘pipeline’ capacity in the context of legal standards of care
Source: Springer Nature journal article supplement (doi:10.1007/s11116-017-9825-8), 2017-10-20
Supplement: MOESM1 [file 15155004]

Table A1: Calculations of capacity (vehicles/lane-hour) for automated cars (Baseline and Scenarios #1 through #9), with comparisons to human-driving behavior (HCM-2010 and Wiedemann-1999). Table shows results from curves in Figure 1, in 5-mph increments.

| Speed (mph) | **Baseline ‘Weak’** | **Baseline ‘Strong’** | Scenario #1 | Scenario #2 | Scenario #3 | Scenario #4 | Scenario #5 | Scenario #6 | Scenario #7 | Scenario #8 | Scenario #9 | Human drivers (HCM-2010) | Human drivers (Wiedemann 1999) |  |  |
| --- | --- | --- | --- | --- | --- | --- | --- | --- | --- | --- | --- | --- | --- | --- | --- |
| 5 | **1,167** | **1,154** | 1,183 | 1,152 | 1,204 | 1,187 | 1,196 | 735 | 1,199 | 1,341 | 964 |  | 696 |  |  |
| 10 | **1,911** | **1,842** | 2,002 | 1,831 | 2,123 | 2,024 | 2,076 | 653 | 2,095 | 2,427 | 1,631 |  | 1,164 |  |  |
| 15 | **2,329** | **2,179** | 2,539 | 2,156 | 2,849 | 2,594 | 2,725 | 515 | 2,773 | 3,142 | 2,044 |  | 1,555 |  |  |
| 20 | **2,528** | **2,299** | 2,872 | 2,265 | 3,436 | 2,967 | 3,202 | 415 | 3,291 | 3,516 | 2,270 |  | 1,912 |  |  |
| 25 | **2,593** | **2,299** | 3,063 | 2,257 | 3,921 | 3,199 | 3,550 | 344 | 3,689 | 3,643 | 2,372 |  | 2,080 |  |  |
| 30 | **2,579** | **2,237** | 3,157 | 2,189 | 4,328 | 3,332 | 3,802 | 293 | 3,996 | 3,615 | 2,394 |  | 2,247 |  |  |
| 35 | **2,521** | **2,147** | 3,185 | 2,095 | 4,675 | 3,396 | 3,980 | 255 | 4,232 | 3,501 | 2,367 |  | 2,392 |  |  |
| 40 | **2,439** | **2,045** | 3,171 | 1,992 | 4,973 | 3,412 | 4,103 | 225 | 4,412 | 3,346 | 2,312 |  | 2,447 |  |  |
| 45 | **2,347** | **1,942** | 3,128 | 1,888 | 5,233 | 3,394 | 4,183 | 202 | 4,548 | 3,175 | 2,242 |  | 2,460 |  |  |
| 50 | **2,251** | **1,842** | 3,068 | 1,788 | 5,462 | 3,354 | 4,231 | 182 | 4,650 | 3,002 | 2,163 |  | 2,463 |  |  |
| 55 | **2,156** | **1,747** | 2,997 | 1,694 | 5,664 | 3,299 | 4,252 | 167 | 4,723 | 2,835 | 2,083 | 1,800 | 2,473 |  |  |
| 60 | **2,064** | **1,658** | 2,919 | 1,606 | 5,845 | 3,235 | 4,255 | 153 | 4,774 | 2,678 | 2,002 | 1,600 | 2,462 |  |  |
| 65 | **1,976** | **1,576** | 2,839 | 1,525 | 6,007 | 3,164 | 4,242 | 142 | 4,806 | 2,533 | 1,924 | 1,400 | 2,465 |  |  |
| 70 | **1,893** | **1,501** | 2,758 | 1,451 | 6,153 | 3,090 | 4,217 | 132 | 4,824 | 2,398 | 1,849 | 1,200 | 2,470 |  |  |
| 75 | **1,816** | **1,431** | 2,678 | 1,382 | 6,286 | 3,015 | 4,184 | 123 | 4,829 | 2,274 | 1,777 | 1,000 |  |  |  |
| 80 | **1,742** | **1,366** | 2,600 | 1,319 | 6,406 | 2,939 | 4,143 | 116 | 4,825 | 2,161 | 1,709 |  |  |  |  |
| 85 | **1,674** | **1,307** | 2,523 | 1,261 | 6,517 | 2,865 | 4,098 | 109 | 4,812 | 2,056 | 1,645 |  |  |  |  |
| 90 | **1,610** | **1,252** | 2,449 | 1,207 | 6,618 | 2,792 | 4,048 | 103 | 4,792 | 1,961 | 1,584 |  |  |  |  |
| 95 | **1,550** | **1,201** | 2,378 | 1,158 | 6,712 | 2,720 | 3,996 | 98 | 4,767 | 1,872 | 1,528 |  |  |  |  |
| 100 | **1,494** | **1,154** | 2,310 | 1,112 | 6,798 | 2,651 | 3,942 | 93 | 4,738 | 1,791 | 1,474 |  |  |  |  |
| Maximum throughput (capacity) | **2,595** | **2,310** | 3,186 | 2,272 | N/A | 3,412 | 4,256 | 743 | 4,829 | 3,647 | 2,394 | N/A | N/A |  |  |
| Speed (mph) at capacity | **26.25** | **22.36** | 35.49 | 21.87 | N/A | 39.54 | 58.10 | 5.83 | 75.00 | 26.25 | 29.35 | N/A | N/A |  |  |

Table A2: Speed versus maximum throughput (vehicles per lane per hour) for human-driven cars per the HCM-2010 model (adapted from TRB 2010, Exhibit 11-2 and 11-3) and automated cars under the *Baseline ‘Weak’ Scenario*. Table shows results from curves in Figure 2, in 5-mph increments.

| Speed (mph) | Automated cars (vehicles per lane per hour) | Human drivers on freeway with 75 mph (121 km/hour) free-flow speed | Human drivers on freeway with 70 mph (113 km/hour) free-flow speed | Human drivers on freeway with 65 mph (105 km/hour) free-flow speed | Human drivers on freeway with 60 mph (97 km/hour) free-flow speed | Human drivers on freeway with 55 mph (89) free-flow speed |
| --- | --- | --- | --- | --- | --- | --- |
| 100 | 1,490 |  |  |  |  |  |
| 95 | 1,549 |  |  |  |  |  |
| 90 | 1,611 |  |  |  |  |  |
| 85 | 1,675 |  |  |  |  |  |
| 80 | 1,744 |  |  |  |  |  |
| 75 | 1,815 | 1,000 |  |  |  |  |
| 70 | 1,890 | 1,672 | 1,200 |  |  |  |
| 65 | 1,976 | 1,950 | 1,856 | 1,400 |  |  |
| 60 | 2,064 | 2,164 | 2,128 | 1,993 | 1,600 |  |
| 55 | 2,156 | 2,344 | 2,337 | 2,239 | 2,124 | 1,800 |
| 50 | 2,250 | 2,250a | 2,250 a | 2,250 a | 2,250 a | 2,250 a |
| 45 | 2,349 | 2,025 a | 2,025 a | 2,025 a | 2,025 a | 2,025 a |
| 40 | 2,440 | 1,800 a | 1,800 a | 1,800 a | 1,800 a | 1,800 a |
| 35 | 2,520 | 1,575 a | 1,575 a | 1,575 a | 1,575 a | 1,575 a |
| 30 | 2,580 | 1,350 a | 1,350 a | 1,350 a | 1,350 a | 1,350 a |
| 25 | 2,592 | 1,125 a | 1,125 a | 1,125 a | 1,125 a | 1,125 a |
| 20 | 2,528 | 900 a | 900 a | 900 a | 900 a | 900 a |
| 15 | 2,329 | 675 a | 675 a | 675 a | 675 a | 675 a |
| 10 | 1,910 | 450 a | 450 a | 450 a | 450 a | 450 a |
| 5 | 1,167 | 225 a | 225 a | 225 a | 225 a | 225 a |
| Maximum throughput (speed at which this occurs in parentheses) | 2,595  (at 26.25 mph [42.24 km/hour]) | 2,400  (at 53.30 mph [85.78 km/hour]) | 2,400  (at 53.30 mph [85.78 km/hour]) | 2,350  (at 52.20 mph [84.01 km/hour]) | 2,300  (at 51.10 mph [82.24 km/hour]) | 2,250  (at 50.00 mph [80.47 km/hour]) |

Notes: a indicates values sourced from the line of constant density of 45 vehicles per lane per mile. HCM-2010 specifies 45 passenger cars per lane per mile as the density at which a standard freeway segment is operating at its maximum capacity at all speeds.

Table A3: Calculations of spacing (rear of to front of , in feet) for automated vehicles (Baseline ‘Weak’ and ‘Strong’ and Scenarios #1 through #9), with comparisons to human-driving behavior (HCM-2010 and Wiedemann-1999). Table shows results from curves in Figure 4, in 5-mph increments.

| Speed (mph) | **Baseline ‘Weak’** | **Baseline ‘Strong’** |  | Scenario #1 | Scenario #2 | Scenario #3 | Scenario #4 | Scenario #5 | Scenario #6 | Scenario #7 | Scenario #8 | Scenario #9 | Human drivers (HCM-2010) | Human drivers (Wiedemann 1999) |
| --- | --- | --- | --- | --- | --- | --- | --- | --- | --- | --- | --- | --- | --- | --- |
| 5 | **4** | **4** |  | 3 | 4 | 3 | 3 | 3 | 17 | 3 | 1 | 4 |  | 19 |
| 10 | **9** | **10** |  | 7 | 10 | 6 | 7 | 6 | 62 | 6 | 3 | 9 |  | 26 |
| 15 | **15** | **17** |  | 12 | 18 | 9 | 12 | 10 | 135 | 10 | 6 | 15 |  | 32 |
| 20 | **23** | **27** |  | 18 | 28 | 12 | 17 | 14 | 236 | 13 | 11 | 23 |  | 36 |
| 25 | **32** | **38** |  | 24 | 39 | 15 | 22 | 18 | 364 | 17 | 17 | 32 |  | 44 |
| 30 | **42** | **52** |  | 31 | 53 | 18 | 29 | 23 | 521 | 21 | 25 | 42 |  | 51 |
| 35 | **54** | **67** |  | 39 | 69 | 21 | 35 | 27 | 706 | 25 | 34 | 54 |  | 58 |
| 40 | **68** | **84** |  | 48 | 87 | 23 | 43 | 32 | 919 | 29 | 44 | 68 |  | 67 |
| 45 | **82** | **103** |  | 57 | 107 | 26 | 51 | 38 | 1,159 | 33 | 56 | 82 |  | 78 |
| 50 | **98** | **124** |  | 67 | 129 | 29 | 60 | 43 | 1,428 | 38 | 69 | 98 |  | 88 |
| 55 | **116** | **147** |  | 78 | 152 | 32 | 69 | 49 | 1,725 | 42 | 83 | 116 | 142 | 98 |
| 60 | **134** | **172** |  | 90 | 178 | 35 | 79 | 55 | 2,049 | 47 | 99 | 134 | 179 | 110 |
| 65 | **155** | **199** |  | 102 | 206 | 38 | 89 | 62 | 2,402 | 52 | 117 | 155 | 226 | 120 |
| 70 | **176** | **227** |  | 115 | 236 | 41 | 101 | 69 | 2,783 | 58 | 135 | 176 | 289 | 131 |
| 75 | **199** | **258** |  | 129 | 267 | 44 | 112 | 76 | 3,191 | 63 | 155 | 199 | 377 |  |
| 80 | **223** | **290** |  | 143 | 301 | 47 | 125 | 83 | 3,628 | 69 | 176 | 223 |  |  |
| 85 | **249** | **324** |  | 159 | 337 | 50 | 138 | 91 | 4,092 | 74 | 199 | 249 |  |  |
| 90 | **276** | **361** |  | 175 | 375 | 53 | 151 | 98 | 4,585 | 80 | 223 | 276 |  |  |
| 95 | **305** | **399** |  | 192 | 414 | 56 | 165 | 107 | 5,105 | 86 | 249 | 305 |  |  |
| 100 | **334** | **439** |  | 210 | 456 | 59 | 180 | 115 | 5,654 | 92 | 276 | 334 |  |  |
